# Supplementary material for: Measurement of the localised plasmon penetration depth for gold nanoparticles using a non-invasive bio-stacking method
Source: Royal Society of Chemistry journal article supplement (doi:10.1039/c3cp50758k), 2013-01-01
Supplement: c3cp50758k.pdf [file c3cp50758k.pdf]

# Supplementary Information for Measurement of the Localised Plasmon Penetration Depth for Gold Nanoparticles using a Non-invasive Bio-stacking Method

Thomas Read, Rouslan V. Olkhov, and Andrew M. Shaw \*

Biosciences, College of Life and Environmental Sciences, University of Exeter, Stocker Road, Exeter, EX4 4QD,  
UK,

\*Corresponding Author

Email: [Andrew.M.Shaw@exeter.ac.uk](mailto:Andrew.M.Shaw@exeter.ac.uk)

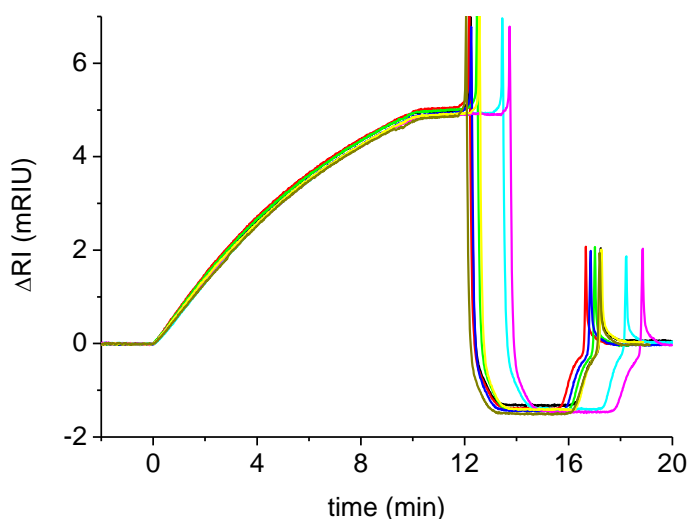

Fig. S1 Repeat injections of 50 nM aBSA binding to BSA on the Array Reader platform. Each binding study was performed for 10 minutes and repeated after a 4 minute regeneration step. With a total error of < 4% from the parameter,  $\vartheta_m$ .
